# Supplementary material for: Assessment of Land Cover and Land Use Change Dynamics in Kibwezi Watershed, Kenya
Source: ScientificWorldJournal. 2022 Dec 12;2022:3944810. doi: 10.1155/2022/3944810 (PMC9763003; doi:10.1155/2022/3944810)
Supplement: Supplementary Materials — The data that supports the research findings of the land use/land cover (LULC) in the Kibwezi watershed are included within the article. However supplementary file is attached which indicates the land cover category codes and their land use description for the same. It also provides LULC for the period 1999, 2009 and 2019 with their respective areas/size in hectares for the study area. [file 3944810.f1.txt]

Value	Count	LC_1999	LC_2009	LC_2019	Area_Ha
136	20	BA	BA	C1	0.2
133	3011	BA	BA	BA	30.11
135	5	cS	BA	C1	0.05
134	1	cS	BA	BA	0.01
145	11	WS	BA	WS	0.11
137	3	WS	BA	C1	0.03
138	315	WS	BA	BA	3.15
132	86	BA	C1	C1	0.86
131	49	BA	C1	BA	0.49
26	28083	C1	C1	cS	280.83
16	23325	C1	C1	WS	233.25
49	8087	C1	C1	C3	80.87
50	3489	C1	C1	C2	34.89
5	1611428	C1	C1	C1	16114.28
21	1902	C1	C1	BA	19.02
7	12445	C1	C1	SG	124.45
54	1617	C1	C1	oS	16.17
35	684	C1	C1	RW	6.84
61	55	C2	C1	cS	0.55
104	3444	C2	C1	WS	34.44
57	731	C2	C1	C2	7.31
45	7011	C2	C1	C1	70.11
93	1351	C2	C1	SG	13.51
59	125	C2	C1	RW	1.25
63	1385	C3	C1	WS	13.85
48	12008	C3	C1	C3	120.08
15	60127	C3	C1	C1	601.27
28	2351	C3	C1	RW	23.51
129	1267	cS	C1	WS	12.67
120	5441	cS	C1	C1	54.41
126	489	cS	C1	BA	4.89
109	396	cS1	C1	WS	3.96
108	35994	cS1	C1	C1	359.94
124	1302	cS1	C1	BA	13.02
119	150	cS1	C1	oS	1.5
4	225	oS	C1	cS	2.25
159	23	oS	C1	C2	0.23
1	25396	oS	C1	C1	253.96
24	11007	WS	C1	cS	110.07
10	24520	WS	C1	WS	245.2
79	4700	WS	C1	C3	47
161	4950	WS	C1	C2	49.5
6	47834	WS	C1	C1	478.34
23	2023	WS	C1	BA	20.23
9	1016	WS	C1	SG	10.16
65	2774	WS	C1	oS	27.74
25	580	WS	C1	RW	5.8
31	5	C1	C2	cS	0.05
44	1145	C1	C2	C2	11.45
22	6514	C1	C2	C1	65.14
27	46	C1	C2	BA	0.46
34	36	C1	C2	RW	0.36
60	101	C2	C2	cS	1.01
88	14	C2	C2	WS	0.14
47	12341	C2	C2	C2	123.41
46	282	C2	C2	C1	2.82
58	722	C2	C2	RW	7.22
32	235	WS	C2	cS	2.35
89	33	WS	C2	WS	0.33
52	29	WS	C2	C2	0.29
42	164	WS	C2	C1	1.64
33	449	WS	C2	RW	4.49
92	12877	C1	C3	C3	128.77
128	1068	C1	C3	C1	10.68
167	1	C1	C3	RW	0.01
56	7816	C3	C3	cS	78.16
77	969	C3	C3	WS	9.69
64	434475	C3	C3	C3	4344.75
78	2733	C3	C3	C1	27.33
99	2392	C3	C3	BA	23.92
76	17353	C3	C3	RW	173.53
142	161	cS	C3	WS	1.61
122	839	cS	C3	C3	8.39
121	392	cS	C3	C1	3.92
125	134	cS1	C3	C3	1.34
123	322	cS1	C3	C1	3.22
146	7147	oS	C3	C3	71.47
158	21	oS	C3	C2	0.21
157	195	oS	C3	C1	1.95
53	1358	WS	C3	cS	13.58
87	1066	WS	C3	WS	10.66
67	82902	WS	C3	C3	829.02
160	2328	WS	C3	C2	23.28
127	4463	WS	C3	C1	44.63
116	62	WS	C3	BA	0.62
156	711	C1	cS	cS	7.11
162	120	C1	cS	WS	1.2
163	144	C1	cS	C1	1.44
83	54	C2	cS	cS	0.54
100	1229	C2	cS	WS	12.29
81	61	C2	cS	C2	0.61
98	356	C2	cS	C1	3.56
82	84	C2	cS	RW	0.84
37	17688	C3	cS	cS	176.88
74	1478	C3	cS	C3	14.78
30	491	C3	cS	C1	4.91
29	1993	C3	cS	RW	19.93
141	124	cS	cS	WS	1.24
143	5	cS	cS	C3	0.05
154	3693	oS	cS	cS	36.93
152	1716	oS	cS	WS	17.16
176	96	oS	cS	SG	0.96
40	46853	WS	cS	cS	468.53
39	17272	WS	cS	WS	172.72
62	1940	WS	cS	C3	19.4
85	1	WS	cS	C2	0.01
38	1173	WS	cS	C1	11.73
147	32	WS	cS	BA	0.32
36	4045	WS	cS	RW	40.45
102	2780	cS1	cS1	oS	27.8
106	209074	cS1	cS1	cS1	2090.74
113	49264	cS1	cS1	WS	492.64
169	160	oS	cS1	WS	1.6
103	2783	WS	cS1	oS	27.83
107	4445	WS	cS1	cS1	44.45
114	27252	WS	cS1	WS	272.52
164	1	WS	cS1	cS	0.01
43	1	C1	oS	WS	0.01
18	2666	C1	oS	C1	26.66
173	3333	cS	oS	WS	33.33
166	96	cS1	oS	WS	0.96
3	32783	oS	oS	cS	327.83
168	84199	oS	oS	WS	841.99
2	156	oS	oS	C1	1.56
171	11371	oS	oS	SG	113.71
165	196509	WS	oS	cS	1965.09
41	79900	WS	oS	WS	799
19	15158	WS	oS	C1	151.58
170	1995	WS	oS	SG	19.95
66	94	WS	oS	oS	0.94
117	30	C3	RW	cS	0.3
73	18	C3	RW	WS	0.18
72	731	C3	RW	C3	7.31
70	5461	C3	RW	RW	54.61
153	593	SG	SG	WS	5.93
149	4947	SG	SG	SG	49.47
139	1400	WS	SG	WS	14
140	2420	WS	SG	SG	24.2
175	742	C1	WS	cS	7.42
17	3776	C1	WS	WS	37.76
13	3968	C1	WS	C1	39.68
14	465	C1	WS	SG	4.65
84	442	C1	WS	oS	4.42
94	163	C2	WS	WS	1.63
90	261	C2	WS	C2	2.61
115	80	C2	WS	C1	0.8
91	96	C2	WS	RW	0.96
75	21	C3	WS	cS	0.21
68	535	C3	WS	WS	5.35
71	127	C3	WS	C3	1.27
20	18	C3	WS	C1	0.18
96	1328	C3	WS	BA	13.28
69	338	C3	WS	RW	3.38
174	41	cS	WS	cS	0.41
110	88790	cS	WS	WS	887.9
130	109	cS	WS	C1	1.09
144	4	cS	WS	BA	0.04
111	8445	cS1	WS	WS	84.45
118	471	cS1	WS	C1	4.71
101	4126	cS1	WS	oS	41.26
105	3868	cS1	WS	cS1	38.68
155	9507	oS	WS	cS	95.07
148	422680	oS	WS	WS	4226.8
172	417	oS	WS	SG	4.17
151	584	SG	WS	WS	5.84
150	389	SG	WS	SG	3.89
55	104131	WS	WS	cS	1041.31
8	1929833	WS	WS	WS	19298.33
86	1	WS	WS	C3	0.01
95	195	WS	WS	C2	1.95
11	12233	WS	WS	C1	122.33
97	1827	WS	WS	BA	18.27
12	5572	WS	WS	SG	55.72
80	142719	WS	WS	oS	1427.19
112	2705	WS	WS	cS1	27.05
51	603	WS	WS	RW	6.03
					61490.15
Area_Ha	Landcover	Landuse	VALUE
70.628	BA	Commercial	8
31.673	BA	Commercial	8
19.060	BA	Commercial	8
14.102	BA	Commercial	8
37.935	BA	Commercial	8
11.571	BA	Commercial	8
29.422	BA	Commercial	8
56.708	BA	Commercial	8
23.040	BA	Commercial	8
58.533	BA	Commercial	8
4.223	BA	Commercial	8
9.106	BA	Commercial	8
10.641	BA	Commercial	8
34.914	BA	Commercial	8
14.145	C1	Agriculture Rainfed	2
17.424	C1	Agriculture Rainfed	2
4.394	C1	Agriculture Rainfed	2
55.530	C1	Agriculture Rainfed	2
29.412	C1	Agriculture Rainfed	2
78.343	C1	Agriculture Rainfed	2
197837.027	C1	Agriculture Rainfed	2
8.877	C1	Agriculture Rainfed	2
22.623	C1	Agriculture Rainfed	2
18.737	C1	Agriculture Rainfed	2
5.832	C1	Agriculture Rainfed	2
48.429	C1	Agriculture Rainfed	2
50.257	C1	Agriculture Rainfed	2
107.120	C1	Agriculture Rainfed	2
17.149	C1	Agriculture Rainfed	2
13.029	C1	Agriculture Rainfed	2
17.726	C1	Agriculture Rainfed	2
269.773	C1	Agriculture Rainfed	2
354.119	C1	Agriculture Rainfed	2
344.696	C1	Agriculture Rainfed	2
31.468	C1	Agriculture Rainfed	2
5.704	C1	Agriculture Rainfed	2
10.319	C1	Agriculture Rainfed	2
197837.027	C1	Agriculture Rainfed	2
174.839	C2	Agriculture Irrigated	1
59.147	C2	Agriculture Irrigated	1
1.713	C2	Agriculture Irrigated	1
2.240	C2	Agriculture Irrigated	1
3.305	C2	Agriculture Irrigated	1
38.683	C2	Agriculture Irrigated	1
1.405	C2	Agriculture Irrigated	1
149.335	C2	Agriculture Irrigated	1
0.433	C2	Agriculture Irrigated	1
4034.141	C3	Agriculture Rainfed Plantation	2
2001.653	C3	Agriculture Rainfed Plantation	2
783.352	C3	Agriculture Rainfed Plantation	2
2127.673	CS	Agriculture, grazing and browsing	2
2229.910	CS	Agriculture, grazing and browsing	2
4144.561	CS	Agriculture, grazing and browsing	2
4748.005	CS	Agriculture, grazing and browsing	2
288.862	CS	Agriculture, grazing and browsing	2
951.344	cS	Browsing and grazing	5
564.380	cS	Browsing and grazing	5
1816.302	cS	Browsing and grazing	5
180.177	cS	Browsing and grazing	5
524.375	cS	Browsing and grazing	5
35.668	cS	Browsing and grazing	5
177.523	cS	Browsing and grazing	5
3328.069	cS	Browsing and grazing	5
609.401	cS	Browsing and grazing	5
53.112	cS	Browsing and grazing	5
195.678	cS	Browsing and grazing	5
2203.854	cS	Browsing and grazing	5
2203.854	cS	Browsing and grazing	5
2203.854	cS	Browsing and grazing	5
838.513	cS	Browsing and grazing	5
838.513	cS	Browsing and grazing	5
50.417	cS	Browsing and grazing	5
292.753	cS	Nature conservation	9
3173.131	cS	Nature conservation	9
364.322	cS	Nature conservation	9
2203.854	cS	Nature conservation	9
50.417	cS	Nature conservation	9
193.043	cS	Nature conservation	9
838.513	cS	Nature conservation	9
2203.854	cS	Nature conservation	9
180.177	cS	Nature conservation	9
177.523	cS	Nature conservation	9
1568.093	oS	Browsing and grazing	5
1965.712	oS	Browsing and grazing	5
1965.712	oS	Browsing and grazing	5
13734.213	oS	Browsing/quarrying	7
1244.022	oS	Browsing/quarrying	7
33.909	oS	Browsing/quarrying	7
747.413	oS	Browsing/quarrying	7
2626.086	oS	Browsing/quarrying	7
191.771	oS	Browsing/quarrying	7
191.771	oS	Nature conservation	9
1965.712	oS	Nature conservation	9
1568.093	oS	Nature conservation	9
13734.213	oS	Nature conservation	9
13734.213	oS	Nature conservation	9
13734.213	oS	Nature conservation	9
13734.213	oS	Nature conservation	9
13734.213	oS	Nature conservation	9
1965.712	oS	Nature conservation	9
67908.323	oS	Nature conservation	9
331.780	RW	Grazing, Browsing/sand harvesting	6
17.329	RW	Grazing, Browsing/sand harvesting	6
288.470	SG	Browsing and grazing/Ranching	6
37.926	SG	Browsing and grazing/Ranching	6
89.188	SG	Browsing and grazing/Ranching	6
55.234	SG	Browsing and grazing/Ranching	6
10.366	SG	Browsing and grazing/Ranching	6
4136.022	SG	Browsing and grazing/Ranching	6
309.508	SG	Browsing and grazing/Ranching	6
39.828	SG	Browsing and grazing/Ranching	6
158.279	SG	Browsing and grazing/Ranching	6
121.362	SG	Browsing and grazing/Ranching	6
426.877	SG	Browsing and grazing/Ranching	6
107.191	SG	Browsing and grazing/Ranching	6
13363.136	SG	Browsing and grazing/Ranching	6
16.286	SG	Nature conservation	9
10.732	SG	Nature conservation	9
13.599	SG	Nature conservation	9
49.338	SG	Nature conservation	9
145.175	SG	Nature conservation	9
184.827	SG	Nature conservation	9
58.694	SG	Nature conservation	9
183.731	SG	Nature conservation	9
13363.136	SG	Nature conservation	9
65.869	SG	Nature conservation	9
4136.022	SG	Nature conservation	9
13363.136	SG	Nature conservation	9
0.592	WB	Water body	3
0.812	WB	Water body	3
0.958	WB	Water body	3
0.623	WB	Water body	3
33.509	WB	Water body	3
1324.628	WS	Grazing, browsing	5
33.969	WS	Grazing, browsing	5
1875.510	WS	Grazing, browsing	5
1907.446	WS	Grazing, browsing	5
1907.446	WS	Grazing, browsing	5
67908.323	WS	Grazing, browsing	5
67908.323	WS	Grazing, browsing	5
67908.323	WS	Grazing, browsing	5
67908.323	WS	Grazing, browsing	5
67908.323	WS	Grazing, browsing	5
67908.323	WS	Grazing, browsing	5
67908.323	WS	Grazing, browsing, apiculture	6
67908.323	WS	Grazing, browsing, apiculture	6
67908.323	WS	Grazing, browsing, apiculture	6
67908.323	WS	Grazing, browsing, apiculture	6
91.881	WS	Nature conservation	9
371.060	WS	Nature conservation	9
68.155	WS	Nature conservation	9
13.299	WS	Nature conservation	9
1907.446	WS	Nature conservation	9
268.718	WS	Nature conservation	9
214.737	WS	Nature conservation	9
33.969	WS	Nature conservation	9
67908.323	WS	Nature conservation	9
268.718	WS	Nature conservation	9
143.746	WS	Nature conservation, apiculture/Grazing, browsing	4
15.148	WS	Nature conservation, apiculture/Grazing, browsing	4
22.342	WS	Nature conservation, apiculture/Grazing, browsing	4
3.494	WS	Nature conservation, apiculture/Grazing, browsing	4
7.245	WS	Nature conservation, apiculture/Grazing, browsing	4
3.527	WS	Nature conservation, apiculture/Grazing, browsing	4
7.940	WS	Nature conservation, apiculture/Grazing, browsing	4
5.924	WS	Nature conservation, apiculture/Grazing, browsing	4
1.210	WS	Nature conservation, apiculture/Grazing, browsing	4
10.294	WS	Nature conservation, apiculture/Grazing, browsing	4
8.932	WS	Nature conservation, apiculture/Grazing, browsing	4
285.376	WS	Nature conservation, apiculture/Grazing, browsing	4
79.697	WS	Nature conservation, apiculture/Grazing, browsing	4
1295.827	WS	Nature conservation, apiculture/Grazing, browsing	4
106.689	WS	Nature conservation, apiculture/Grazing, browsing	4
85.294	WS	Nature conservation, apiculture/Grazing, browsing	4
276.342	WS	Nature conservation, apiculture/Grazing, browsing	4
435.016	WS	Nature conservation, apiculture/Grazing, browsing	4
16158.779	WS	Nature conservation, apiculture/Grazing, browsing	4
1907.446	WS	Nature conservation, apiculture/Grazing, browsing	4
67908.323	WS	Nature conservation, apiculture/Grazing, browsing	4
268.718	WS	Nature conservation, apiculture/Grazing, browsing	4
268.718	WS	Nature conservation, apiculture/Grazing, browsing	4
Final landcover description
Area_Ha	Landcover	Landuse	VALUE
70.628	BA	Commercial	8
14.145	C1	Agriculture Rainfed	2
174.839	C2	Agriculture Irrigated	1
4034.141	C3	Agriculture Rainfed Plantation	2
2127.673	CS	Agriculture, grazing and browsing	2
951.344	cS_1	Browsing and grazing	5
1568.093	oS	Browsing and grazing	5
331.780	RW	Grazing, Browsing/sand harvesting	6
288.470	SG	Browsing and grazing/Ranching	6
0.592	WB	Water body	3
1324.628	WS	Grazing, browsing	5
